# Supplementary material
Source: publisher figshare collection journal article supplement (https://tandf.figshare.com/ndownloader/files/31068138)

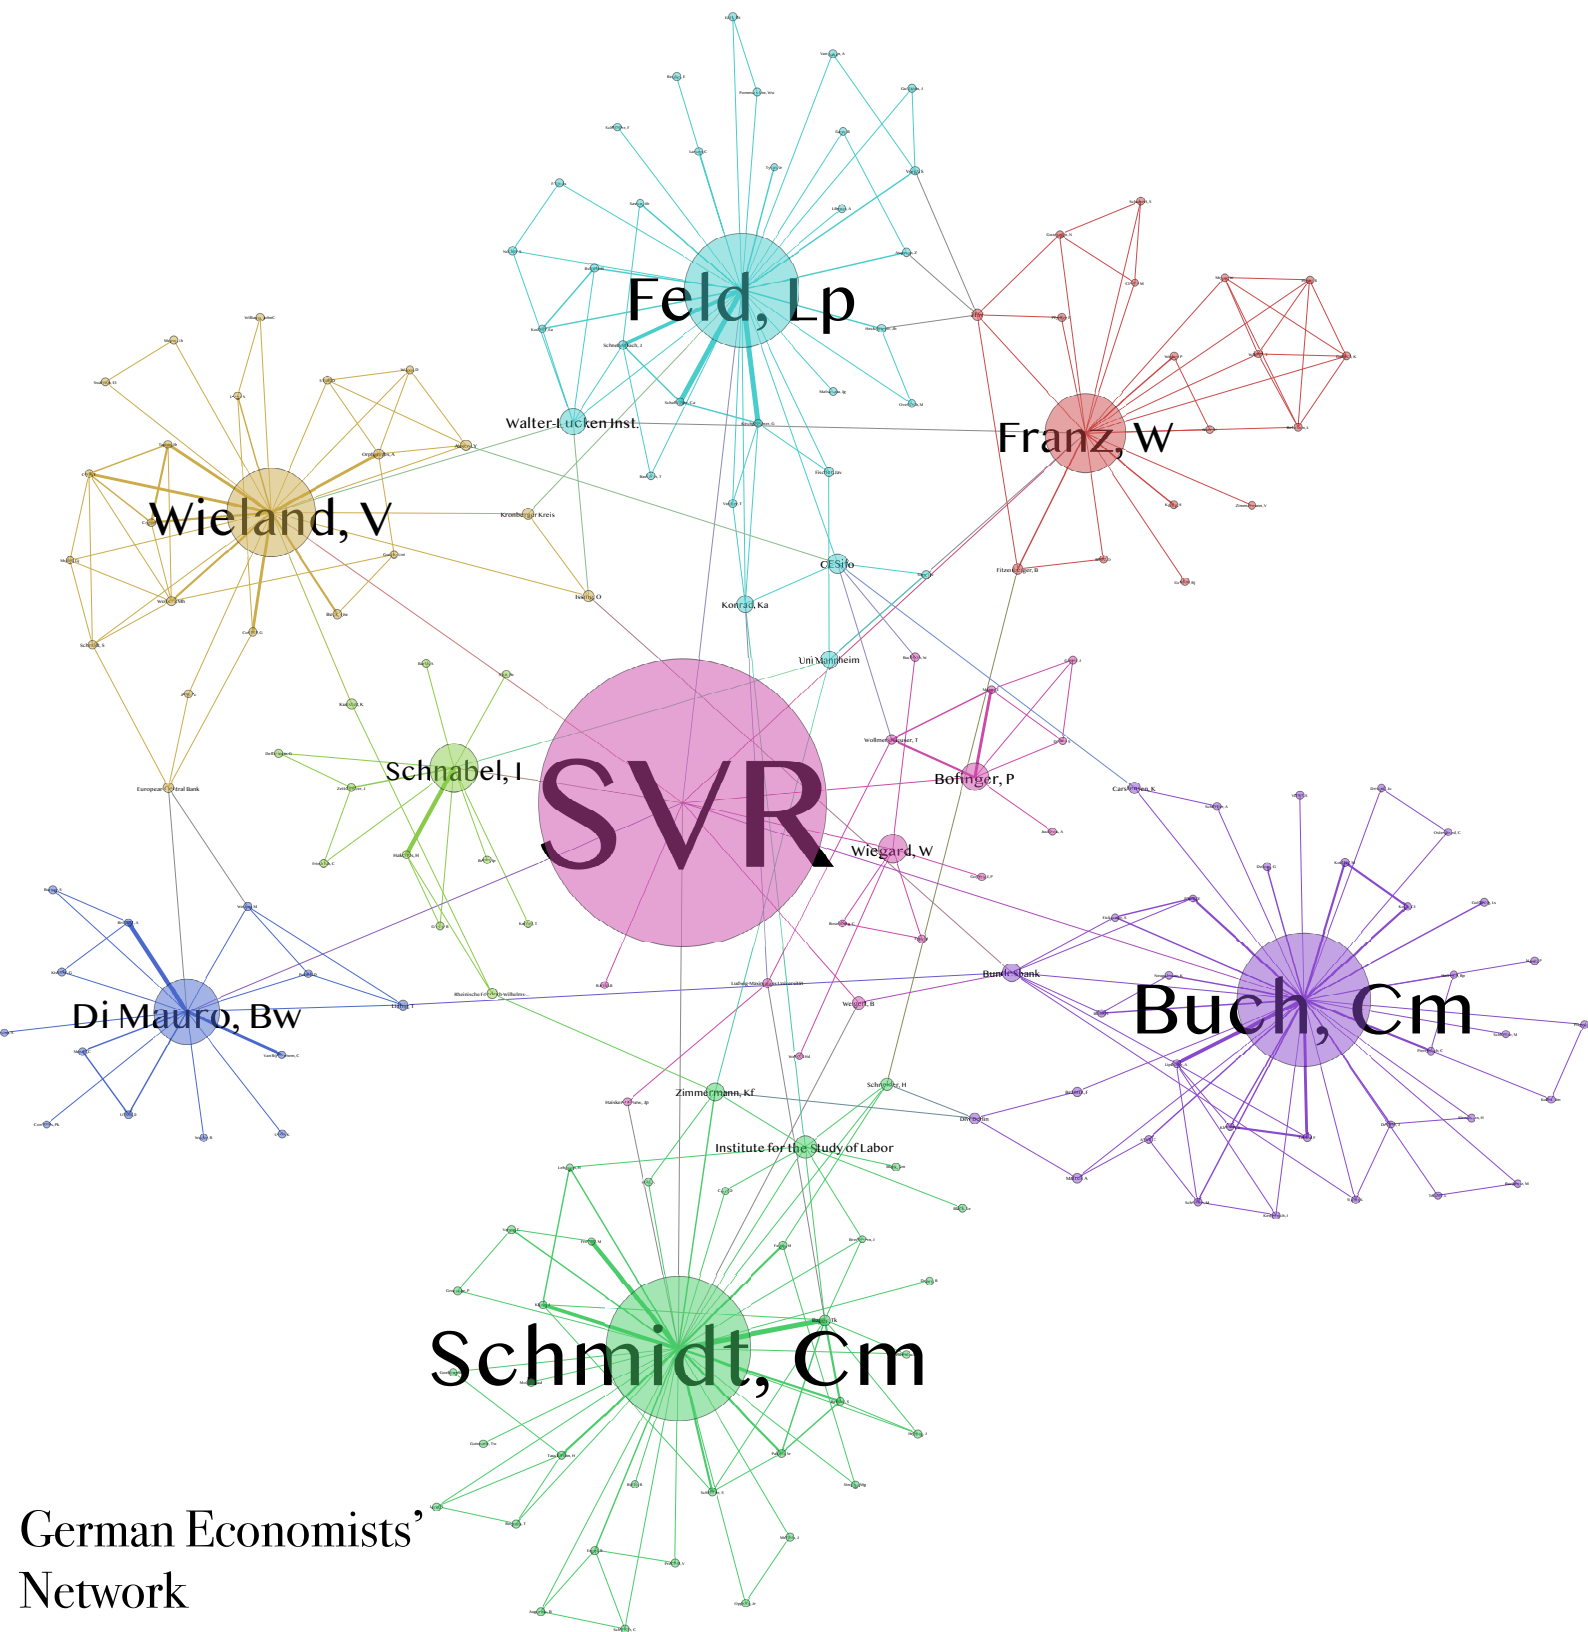

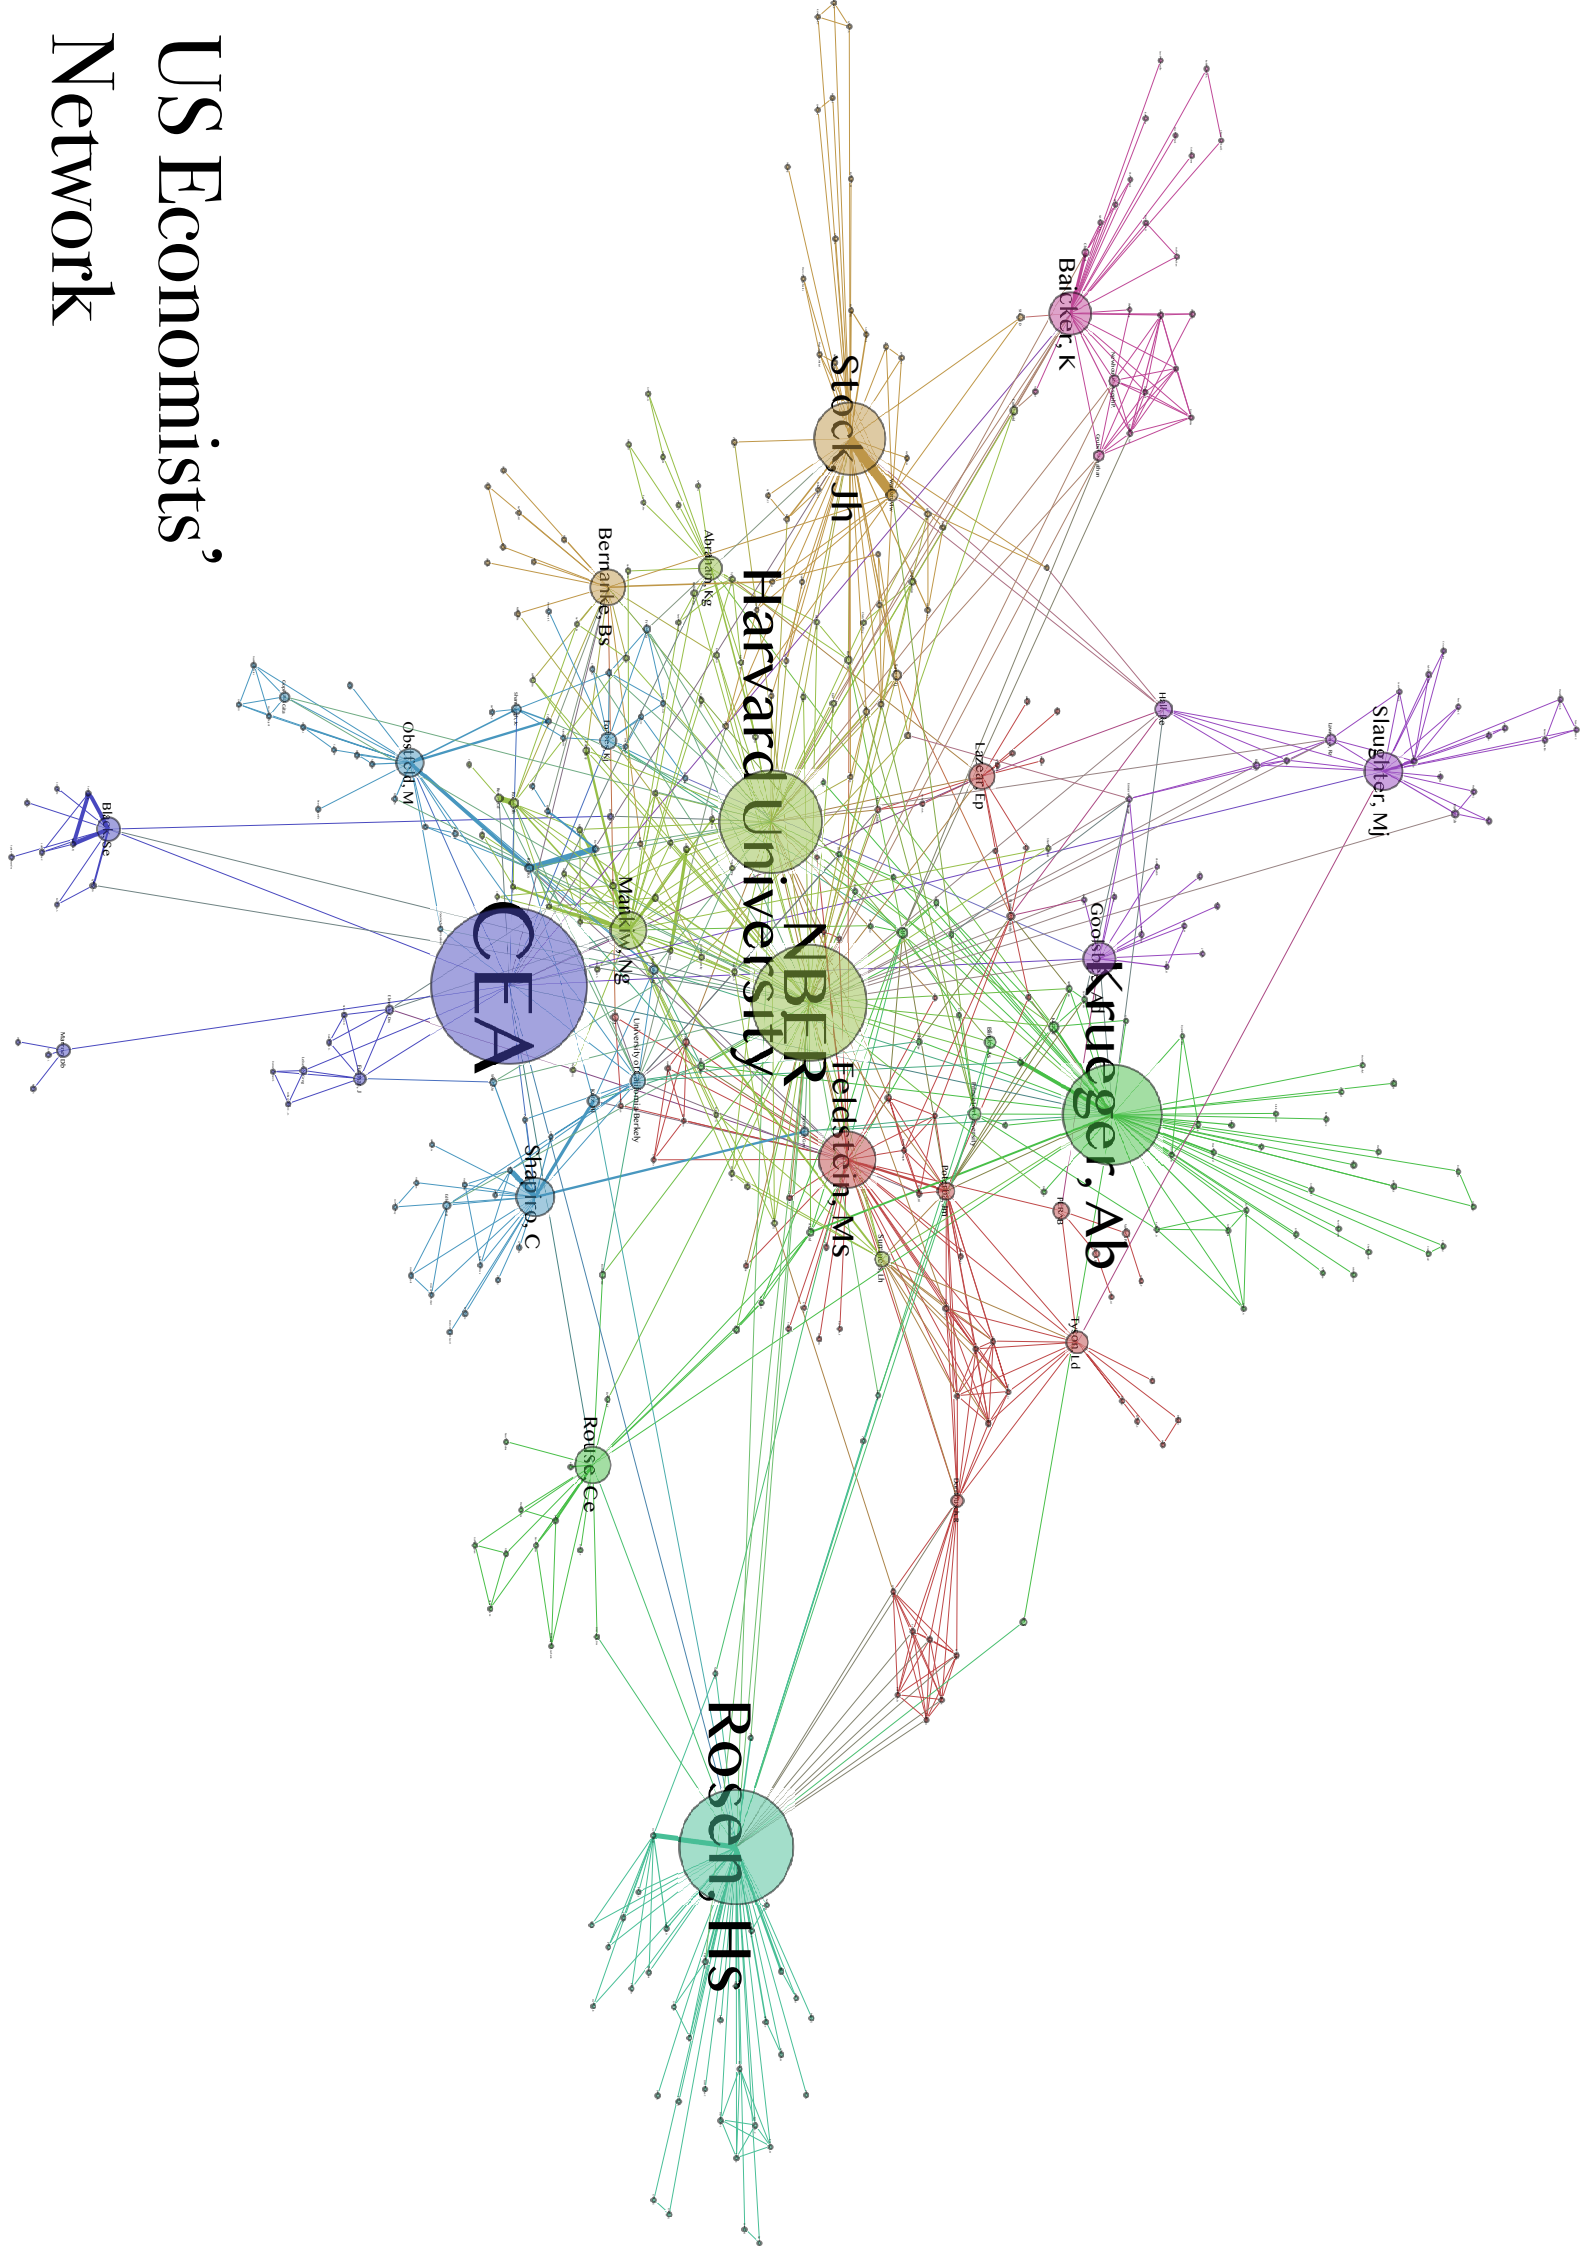

US Economists'  
Network

Supplement: Supplementary file 1 [file 31068138]
